# Supplementary material for: A unified route for flavivirus structures uncovers essential pocket factors conserved across pathogenic viruses
Source: PubMed Central journal article supplement (PMC8169900; doi:10.1038/s41467-021-22773-1), 2021-06-01
Supplement: 41467_2021_22773_MOESM1_ESM.pdf [file 41467_2021_22773_MOESM1_ESM.pdf]

**A unified route for flavivirus structures uncovers essential pocket factors  
conserved across pathogenic viruses**

Joshua M Hardy<sup>1,†</sup>, Natalee D Newton<sup>2,†</sup>, Naphak Modhiran<sup>2</sup>, Connor AP Scott<sup>2</sup>, Hari Venugopal<sup>3</sup>,  
Laura J Vet<sup>2</sup>, Paul R Young<sup>2</sup>, Roy A Hall<sup>2</sup>, Jody Hobson-Peters<sup>2</sup>, Fasséli Coulibaly<sup>1,†\*</sup>, Daniel  
Watterson<sup>2,†\*</sup>

1. Infection & Immunity Program, Biomedicine Discovery Institute & Department of Biochemistry and Molecular Biology, Monash University, Clayton, VIC, Australia
2. Australian Infectious Diseases Research Centre, School of Chemistry and Molecular Biosciences, The University of Queensland, Brisbane, Australia
3. Ramaciotti Centre for Cryo-Electron Microscopy, Monash University, Clayton, VIC, Australia

\* Correspondence to: [fasseli.coulibaly@monash.edu](mailto:fasseli.coulibaly@monash.edu) , [d.watterson@uq.edu.au](mailto:d.watterson@uq.edu.au)

† These authors contributed equally

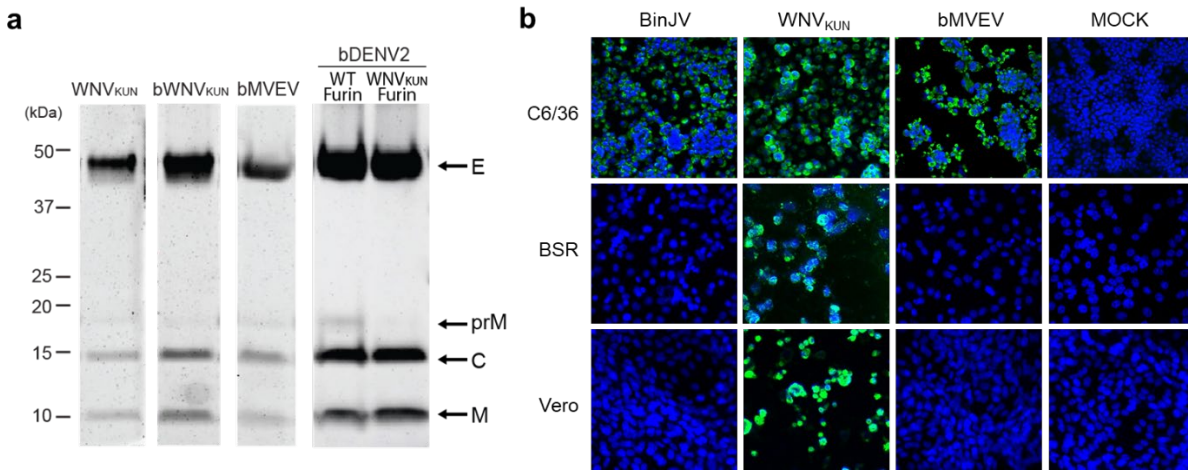

**Supplementary Figure 1. Characterisation of BinJV chimeras. (a)** SDS-PAGE (4-12%) analysis of gradient purified WNV<sub>KUN</sub>, bWNV<sub>KUN</sub>, bMVEV and bDENV2 (WT and enhanced furin cleavage site) virions stained with SYPRO Ruby protein stain. Viral protein identity indicated by arrows. **(b)** Analysis of bMVEV growth in vertebrate cells. C6/36, BSR and Vero cell monolayers were infected at an MOI of 1 or mock-infected and fixed after 7 days incubation. IFA analysis was performed using the pan-flavivirus anti-NS1 antibody, 4G4. Nuclei were stained with Hoechst 33342. Images taken at 20x magnification.

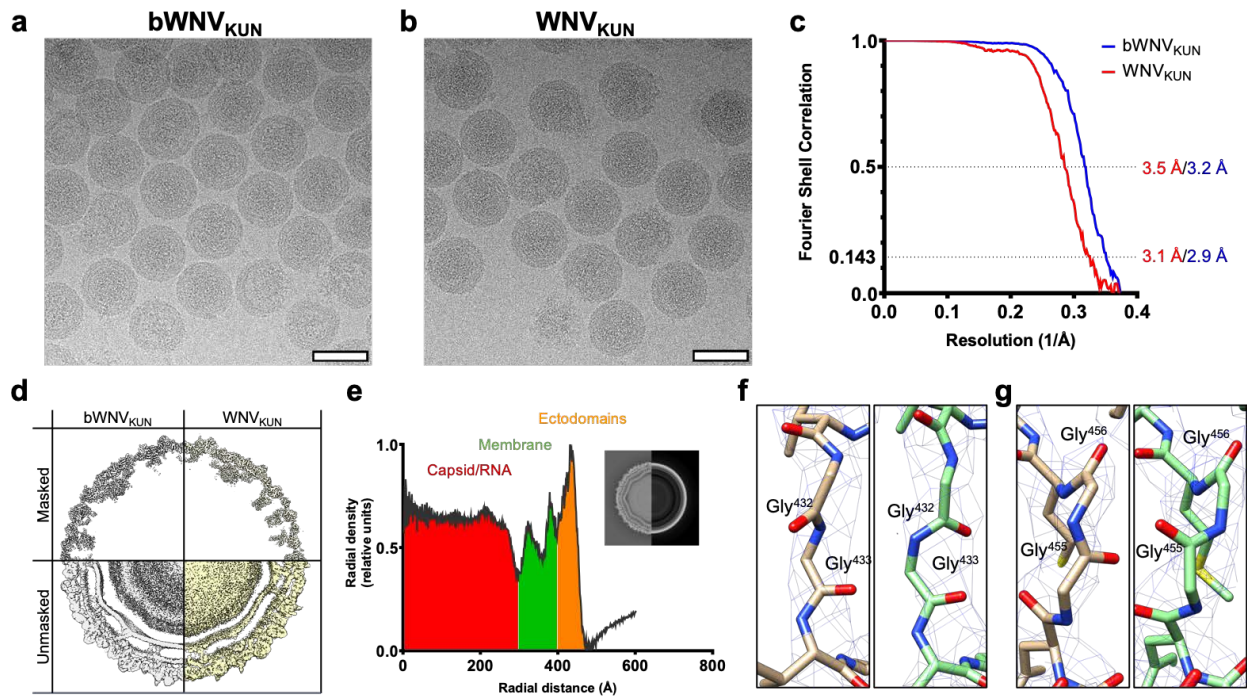

**Supplementary Figure 2. Cryo-EM reconstructions of WNV<sub>KUN</sub> and bWNV<sub>KUN</sub>.** (a-b) Typical micrographs for bWNV<sub>KUN</sub> (a) and WNV<sub>KUN</sub> (b). Scale bar represents 50 nm. (c) Fourier shell correlation plots for bWNV<sub>KUN</sub> (blue) and WNV<sub>KUN</sub> (red) reconstructions. (d) Comparison of masked and unmasked maps of bWNV<sub>KUN</sub> and WNV<sub>KUN</sub>. (e) Radial average of bWNV<sub>KUN</sub> map coloured according to composition: capsid/RNA (red), membrane (green), and protein ectodomains (orange). Inset shows central slice of reconstruction (left) and the radially averaged image (right). Refinement of atomic models were performed independently for bWNV<sub>KUN</sub> (beige sticks) and WNV<sub>KUN</sub> (green sticks) in the EM maps (blue mesh). The most significant differences were mainchain flips of two glycine residues, (f) Gly432 and (g) Gly455.

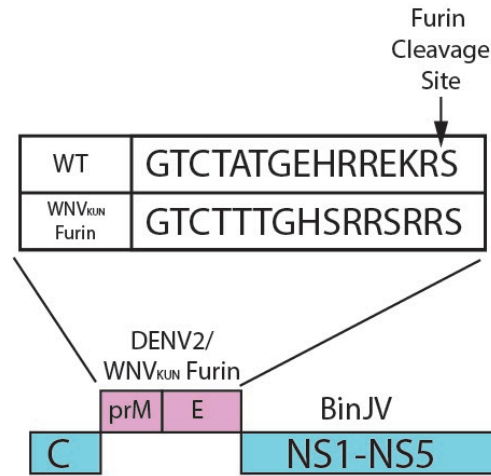

**Supplementary Figure 3. Optimization of the DENV Furin cleavage site.** Residues surrounding the furin cleavage site in bDENV-2 were exchanged with those of WNV<sub>KUN</sub> to improve prM processing and particle homogeneity. Sequence alignment is shown with furin site indicated.

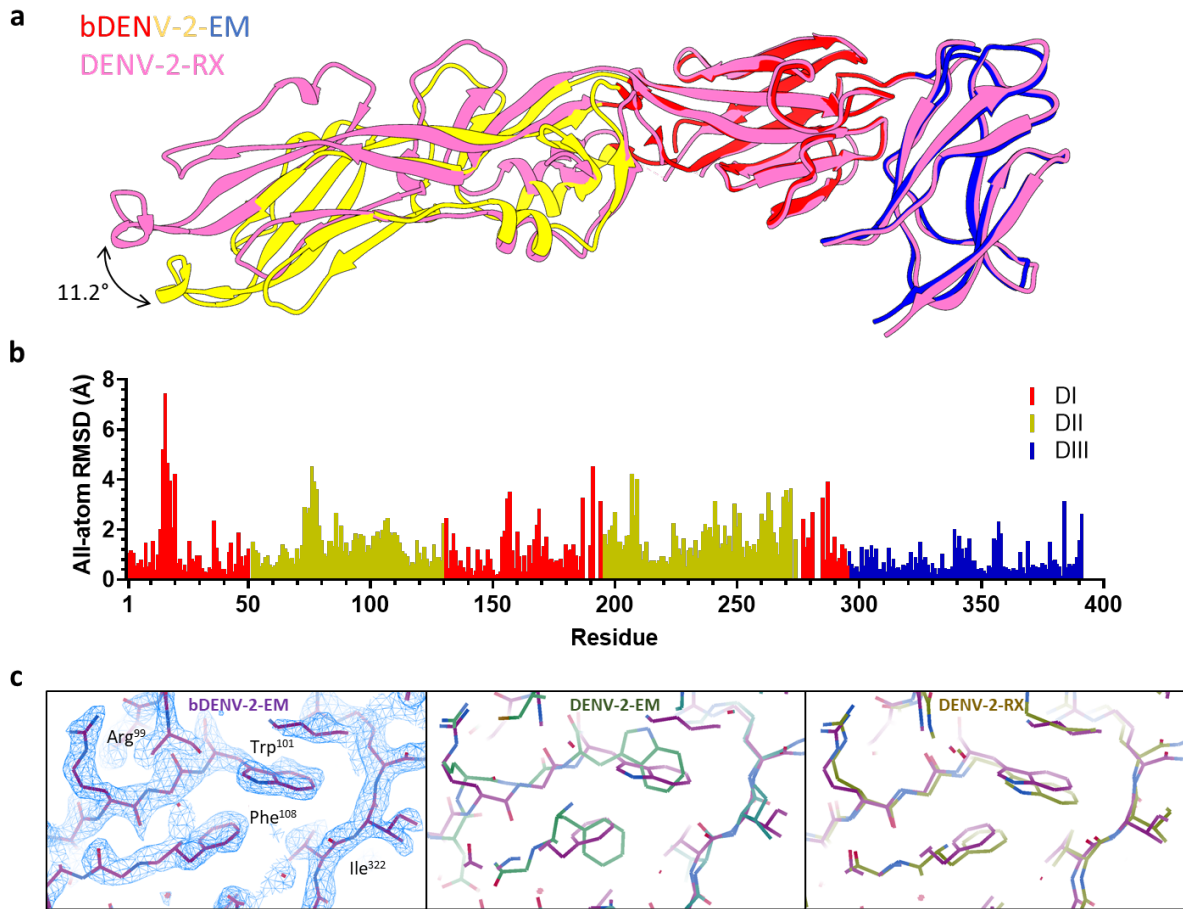

**Supplementary Figure 4. Comparison of bDENV-2 structure to a crystal structure of DENV-2.** (a) Alignment of the ectodomain of E5 between bDENV-2 (colored by domain) and a crystal structure of DENV-2 (pink, PDB: 4UTC) in a cartoon representation. An arrow indicates the hinge movement of DII. (b) All-atom RMSD between the structures in (a) coloured by domains. Domains were aligned independently of each other. (c) Comparison of the bDENV-2 structure (purple) with an EM structures of DENV-2 (green, PDB: 3J27) and a crystal structure of DENV-2 (yellow, PDB: 4UTC) near the fusion loop. Each structure is displayed as sticks with bDENV-2 present in each panel.

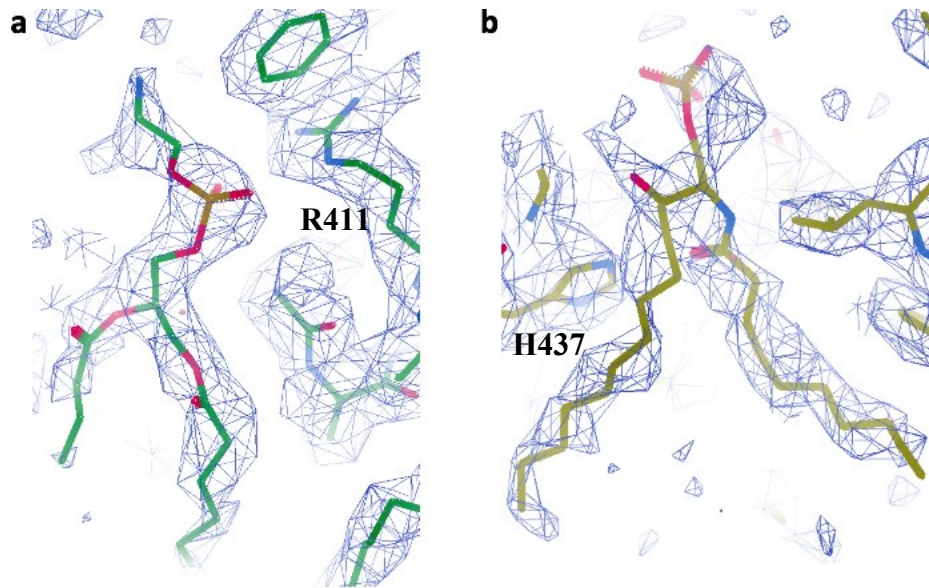

**Supplementary Figure 5. Pocket factors in the bDENV-2 structure.** Density fit of site 1 (a) and site 2 (b) pocket factors modelled as a phosphatidylethanolamine (PDB ligand 6OU) and phosphoceramide (PBD ligand 1Q0), respectively. The density is shown at 1.3 sigma. While the quality of the map does not allow unambiguous identification of the pocket factors, very similar bifurcated densities are observed for the 3 independent molecules in the asymmetric unit of the icosahedra particle.

Supplementary Table 1. Cryo-EM data collection, refinement and validation statistics

|                                                     | <b>WNV<sub>KUN</sub></b><br><b>(EMD-23044,</b><br><b>PDB 7KVA)</b> | <b>bWNV<sub>KUN</sub></b><br><b>(EMD-23043,</b><br><b>PDB 7KV9)</b> | <b>bMVEV</b><br><b>(EMD-23045,</b><br><b>PDB 7KVB)</b> | <b>bDENV2</b><br><b>(EMD-23042,</b><br><b>PDB 7KV8)</b> |
|-----------------------------------------------------|--------------------------------------------------------------------|---------------------------------------------------------------------|--------------------------------------------------------|---------------------------------------------------------|
| <b>Data collection and processing</b>               |                                                                    |                                                                     |                                                        |                                                         |
| Magnification                                       | 105,000                                                            | 105,000                                                             | 130,000                                                | 130,000                                                 |
| Voltage (kV)                                        | 300                                                                | 300                                                                 | 300                                                    | 300                                                     |
| Electron exposure (e <sup>-</sup> /Å <sup>2</sup> ) | 57.6                                                               | 30.6                                                                | 25                                                     | 67.7                                                    |
| Defocus range (μm)                                  | 0.5-1.8                                                            | 0.3-1.7                                                             | 0.6-2.0                                                | 0.3-2.0                                                 |
| Pixel size (Å)                                      | 0.67                                                               | 0.67                                                                | 0.52                                                   | 0.52                                                    |
| Micrographs                                         | 1,517                                                              | 3,209                                                               | 2,829                                                  | 4,722                                                   |
| Symmetry imposed                                    | I                                                                  | I                                                                   | I                                                      | I                                                       |
| Initial particle images (no.)                       | 33,918                                                             | 130,675                                                             | 13,143                                                 | 196,292                                                 |
| Final particle images (no.)                         | 7,551                                                              | 40,058                                                              | 12,812                                                 | 111,223                                                 |
| Map resolution at 0.143 FSC (Å)                     | 3.1                                                                | 2.9                                                                 | 3.7                                                    | 2.5                                                     |
| <b>Refinement</b>                                   |                                                                    |                                                                     |                                                        |                                                         |
| Initial model used (PDB code)                       | (bWNV <sub>KUN</sub> )                                             | 6CO8                                                                | (bWNV <sub>KUN</sub> )                                 | 6CO8                                                    |
| Model resolution (Å)                                | 2.9/3.1                                                            | 2.7/2.9                                                             | 3.3/3.6                                                | 2.2/2.4                                                 |
| FSC threshold                                       | 0.143/0.5                                                          | 0.143/0.5                                                           | 0.143/0.5                                              | 0.143/0.5                                               |
| Cross-correlation (masked)                          | 0.82                                                               | 0.85                                                                | 0.80                                                   | 0.84                                                    |
| Map-sharpening <i>B</i> factor (Å <sup>2</sup> )    | -82                                                                | -98                                                                 | -128                                                   | -77                                                     |
| Model composition                                   |                                                                    |                                                                     |                                                        |                                                         |
| Nonhydrogen                                         | 12877                                                              | 12893                                                               | 12717                                                  | 13780                                                   |
| Protein residues                                    | 1716                                                               | 1716                                                                | 1716                                                   | 1701                                                    |
| Ligands                                             | NAG: 3                                                             | NAG: 3                                                              | NAG: 3                                                 | NAG: 3<br>1Q0:3<br>6OU:3                                |
| Water                                               | -                                                                  | -                                                                   | -                                                      | 454                                                     |
| <i>B</i> factors (Å <sup>2</sup> )                  |                                                                    |                                                                     |                                                        |                                                         |
| Protein                                             | 9.25                                                               | 17.56                                                               | 15.53                                                  | 10.16                                                   |
| Ligand                                              | 21.85                                                              | 29.25                                                               | 33.65                                                  | 22.36                                                   |
| Water                                               | -                                                                  | -                                                                   | -                                                      | 7.07                                                    |
| R.m.s. deviations                                   |                                                                    |                                                                     |                                                        |                                                         |
| Bond lengths (Å)                                    | 0.002                                                              | 0.003                                                               | 0.002                                                  | 0.008                                                   |
| Bond angles (°)                                     | 0.467                                                              | 0.481                                                               | 0.445                                                  | 0.779                                                   |
| Validation                                          |                                                                    |                                                                     |                                                        |                                                         |
| MolProbity score                                    | 1.35                                                               | 1.33                                                                | 1.54                                                   | 1.62                                                    |
| Clashscore                                          | 6.38                                                               | 5.54                                                                | 7.63                                                   | 8.70                                                    |
| Poor rotamers (%)                                   | 0.00                                                               | 0.00                                                                | 0.07                                                   | 1.26                                                    |
| Ramachandran plot                                   |                                                                    |                                                                     |                                                        |                                                         |
| Favored (%)                                         | 98.53                                                              | 97.89                                                               | 97.36                                                  | 97.62                                                   |
| Allowed (%)                                         | 1.47                                                               | 2.11                                                                | 2.64                                                   | 2.38                                                    |
| Disallowed (%)                                      | 0.00                                                               | 0.00                                                                | 0.00                                                   | 0.00                                                    |

Supplementary Table 2. Primers used for chimeric virus generation

| Fragment                                | Template             | Primer (5' – 3')                                                       |                                            |
|-----------------------------------------|----------------------|------------------------------------------------------------------------|--------------------------------------------|
| 5' UTR – C                              | BinJV                | F GCCCGCAACGATCTGGTAAACAGTATATTTTGCCTGTGCG                             |                                            |
|                                         |                      | R AGCCATCGCTCCTGCTCCAACGAGCAGC                                         |                                            |
| prM – E                                 | WNV <sub>KUN</sub>   | F GCTGCTCGTTGGAGCAGGAGCGATGGCTGTCACTCTCTCCAACTT<br>CCAAGGGAAGG         |                                            |
|                                         |                      | R CCAGACTGCATCCTATTTCCGATAGAGCATGCACGTTACGGAAA<br>GAAAGAGC             |                                            |
|                                         | MVEV                 | F GCTGCTCGTTGGAGCAGGAGCGATGGCTTAAAGCTTCCACCTT<br>CCAGGGC               |                                            |
|                                         |                      | R CCAGACTGCATCCTATTTCCGATAGAGCATGGACATTTGTGGCCA<br>GG                  |                                            |
|                                         | DENV-2               | F GCTGCTCGTTGGAGCAGGAGCGATGGCTTTCATCTGACCACACG<br>TAACGGAGAA           |                                            |
|                                         |                      | R CTTTCGGCTAATGTCCAGACTGCATCCTATTTCCGGCCTGCACCAT<br>AACTCCCAAATAC      |                                            |
|                                         | DENV-2<br>Furin site | F ACAGGACTCAAGACGCAGTAGAAGGTCAGTGGCACTCGTTCC<br>ACATGTGGGAA            |                                            |
|                                         |                      | R TGCCACTGACCTTCTACTGCGTCTTGAGTGTCTGTGGTGGTACA<br>CGTCCATAAGT          |                                            |
|                                         | NS1 – 2B             | BinJV                                                                  | F CTATCGGAAATAGGATGCAGTCTGGACATTAGCCGAAAAG |
|                                         |                      |                                                                        | R CCACAACACAGTCCCCCGCTTGTTTGATTT           |
|                                         | NS3 – 4B             | BinJV                                                                  | F AAATCAAACAAGCGGGGGACTGTGTTGTGG           |
|                                         |                      |                                                                        | R GGTGGCCTGTAATCCCCTCCTAGGAACTCC           |
| NS5                                     | BinJV                | F GGAGTTCCTAGGAGGGGATTACAGGCCACC                                       |                                            |
|                                         |                      | R TGCCATGCCGACCCAGATACTTGATGTTTC                                       |                                            |
| 3' UTR                                  | BinJV                | F GGCAATGTGATCTAAGGATCTACGAACGAG                                       |                                            |
|                                         |                      | R TGCCATGCCGACCCAGATACTTGATGTTTC                                       |                                            |
| Linker                                  | BinJV                | F TGGATTGGGGATTGAGAAACATCAAGTATCTGGGTCGGCATGGC<br>ATCTCCACCTCCTCGC     |                                            |
|                                         |                      | R GTGTTTTGAAACGCACACGCAAAATATACTGTTTACCAGATCGTT<br>GCGGGCTGTATTTATAGGC |                                            |
| <b>bDENV2 lipid mutagenesis primers</b> |                      |                                                                        |                                            |
| R441A                                   |                      | F GACAACAATGAGGGGAGCGAAGGCAATGGCCATTTTAGGTGACA<br>CAGCTTGGGATTTTG      |                                            |
|                                         |                      | R CACCTAAAATGGCCATTGCCTTCGCTCCCCTCATTGTTGTCTCAAT<br>CATTTGGCCGATAG     |                                            |
| R411K                                   |                      | F GACAACAATGAGGGGAGCGAAGAAAATGGCCATTTTAGGTGACA<br>CAGCTTGGGATTTTG      |                                            |
|                                         |                      | R CACCTAAAATGGCCATTTTCTTCGCTCCCCTCATTGTTGTCTCAAT<br>CATTTGGCCGATAG     |                                            |
| R411D                                   |                      | F GACAACAATGAGGGGAGCGAAGGATATGGCCATTTTAGGTGACA<br>CAGCTTGGGATTTTG      |                                            |
|                                         |                      | R CACCTAAAATGGCCATATCCTTCGCTCCCCTCATTGTTGTCTCAAT<br>CATTTGGCCGATAG     |                                            |
| W420A                                   |                      | F CCATTTTAGGTGACACAGCTGCAGATTTTGGATCCCTGGGAGGAG<br>TGTTTACATCTATAG     |                                            |



|       |   |                                                                                                |
|-------|---|------------------------------------------------------------------------------------------------|
|       | R | CTCCTCCCAGGGATCCAAAATCTGCAGCTGTGTCACCTAAAATGG<br>CCATTCTCTTCGCTC                               |
| F422A | F | CATTTTAGGTGACACAGCTTGGGATGCAGGATCCCTGGGAGGAG<br>TGTTTACATCTATAGG                               |
|       | R | CTCCTCCCAGGGATCCTGCATCCCAAGCTGTGTCACCTAAAATGG<br>CCATTCTCTTCGCTC                               |
| H437A | F | GTTTACATCTATAGGAAAGGCTCTCGCACAAAGTTTTTCGGAGCAAT<br>CTATGGGGCTGCC                               |
|       | R | GCTCCGAAAACCTGTGCGAGAGCCTTTCCTATAGATGTAAACACT<br>CCTCCCAGGGATC                                 |
| G441A | F | GAAAGGCTCTCCACCAAGTTTTTCGCAGCAATCTATGGGGCTGCCT<br>TCAGTGGGGTCTC                                |
|       | R | CAGCCCCATAGATTGCTGCGAAAACCTGGTGGAGAGCCTTTCCTA<br>TAGATGTAAACACTC                               |
| Y444A | F | CTCCACCAAGTTTTTCGGAGCAATCGCAGGGGCTGCCTTCAGTGGG<br>GTCTCATGGACTATG                              |
|       | R | CACTGAAGGCAGCCCCTGCGATTGCTCCGAAAACCTGGTGGAGA<br>GCCTTTCCTATAGATG                               |
| F448A | F | GTTTTTCGGAGCAATCTATGGGGCTGCCGCAAGTGGGGTCTCATGG<br>ACTATGAAAATCCTC                              |
|       | R | GAGACCCCACTTGCGGCAGCCCCATAGATTGCTCCGAAAACCTGG<br>TGGAGAGCCTTTC                                 |
| L489A | F | GTCACTAGTATTGGTGGGAGTCGTGACGCTGTATGCAGGAGTTAT<br>GGTGCAGGCCGAAATAGGATGCAGTCTGGACATTAGCCGAAAAG  |
|       | R | CTTTTCGGCTAATGTCCAGACTGCATCCTATTTTCGGCCTGCACCAT<br>AACTCCTGCATACAGCGTCACGACTCCCACCAATACTAGTGAC |

**Supplementary Table 3. Vitrification parameters for plunge freezing.**

| <b>Sample</b>       | <b>Wait time (s)</b> | <b>Blot time (s)</b> | <b>Blot force</b> | <b>Drain time (s)</b> |
|---------------------|----------------------|----------------------|-------------------|-----------------------|
| bDENV-2             | 0                    | 2.5                  | -2                | 1                     |
| bMVEV               | 0                    | 2                    | -10               | 1                     |
| bWNV <sub>KUN</sub> | 0                    | 2                    | -12               | 1                     |
| WNV <sub>KUN</sub>  | 0                    | 2                    | -10               | 1                     |

**Supplementary Table 4. Sequences used for conservation analysis.** For mosquito-borne flaviviruses (MBF's) and tick-borne flaviviruses (TBF's) genomes were obtained from the Swiss-Prot database. For species with several strains, only one strain was selected. In the case of the dual-host-affiliated insect-specific flaviviruses (dISF's) the Binjari genome was used to search the UniRef90 database for related genomes and entries which had complete genomes were included.

| Entry      | Entry name       | Organism                                                      | Length | Class |
|------------|------------------|---------------------------------------------------------------|--------|-------|
| Q91B85     | POLG_ALKV        | Alkhumra hemorrhagic fever virus (ALKV)                       | 3416   | TBF   |
| D7RF80     | POLG_KFDV        | Kyasanur forest disease virus (KFDV)                          | 3416   | TBF   |
| P29837     | POLG_LANVT       | Langat virus (strain TP21)                                    | 3414   | TBF   |
| P22338     | POLG_LIV         | Louping ill virus (Li)                                        | 3414   | TBF   |
| Q7T6D2     | POLG_OHFV        | Omsk hemorrhagic fever virus (OHFV)                           | 3414   | TBF   |
| Q04538     | POLG_POWVL       | Tick-borne powassan virus (strain LB) (POWV) (Powassan virus) | 3415   | TBF   |
| C8XPA8     | POLG_BANV        | Banzi virus (BANV)                                            | 3393   | MBF   |
| Q32ZE0     | POLG_BUSV        | Bussuquara virus (BUSV)                                       | 3429   | MBF   |
| P17763     | POLG_DEN1W       | Dengue virus type 1 (strain Nauru/West Pac/1974) (DENV-1)     | 3392   | MBF   |
| P14340     | POLG_DEN2N       | Dengue virus type 2 (strain Thailand/NGS-C/1944) (DENV-2)     | 3391   | MBF   |
| P27915     | POLG_DEN3P       | Dengue virus type 3 (strain Philippines/H87/1956) (DENV-3)    | 3390   | MBF   |
| Q58HT7     | POLG_DEN4P       | Dengue virus type 4 (strain Philippines/H241/1956) (DENV-4)   | 3387   | MBF   |
| C8XPB2     | POLG_EHV         | Edge Hill virus (EHV)                                         | 3401   | MBF   |
| Q32ZD7     | POLG_ILHV        | Ilheus virus (ILHV)                                           | 3424   | MBF   |
| P27395     | POLG_JAEV1       | Japanese encephalitis virus (strain SA-14) (JEV)              | 3432   | MBF   |
| Q32ZD5     | POLG_KOKV        | Kokobera virus (KOKV)                                         | 3410   | MBF   |
| P14335     | POLG_KUNJM       | Kunjin virus (strain MRM61C)                                  | 3433   | MBF   |
| P05769     | POLG_MVEV5       | Murray valley encephalitis virus (strain MVE-1-51) (MVEV)     | 3434   | MBF   |
| Q32ZD4     | POLG_ROCV        | Rocio virus (ROCV)                                            | 3425   | MBF   |
| P09732     | POLG_STEVM       | St. louis encephalitis virus (strain MS1-7)                   | 3412   | MBF   |
| Q5WPU5     | POLG_USUV        | Usutu virus (USUV)                                            | 3434   | MBF   |
| C5H431     | POLG_WSLV        | Wesselsbron virus (WSLV)                                      | 3405   | MBF   |
| Q9Q6P4     | POLG_WNV9        | West Nile virus (strain NY-99) (WNV)                          | 3433   | MBF   |
| Q6DV88     | POLG_YEFVA       | Yellow fever virus (strain Ghana/Asibi/1927) (YFV)            | 3411   | MBF   |
| Q32ZE1     | POLG_ZIKV        | Zika virus (ZIKV)                                             | 3419   | MBF   |
| A0A5K6VMX2 | A0A5K6VMX2_9FLAV | Binjari virus                                                 | 3433   | dISF  |
| H9CH24     | H9CH24_9FLAV     | Chaoyang virus                                                | 3435   | dISF  |
| H9BYJ9     | H9BYJ9_9FLAV     | Donggang virus                                                | 3444   | dISF  |
| A0A5B8RNL2 | A0A5B8RNL2_9FLAV | Guapiacu virus                                                | 3438   | dISF  |
| A0A088BPV6 | A0A088BPV6_9FLAV | Lammi virus                                                   | 3434   | dISF  |
| A0A292E049 | A0A292E049_9FLAV | Long Pine Key virus                                           | 3459   | dISF  |
| A0A290Y5I2 | A0A290Y5I2_9FLAV | Marisma mosquito virus                                        | 3450   | dISF  |

**Supplementary Note 1. UTR and OpiE2 linker region for BinJV chimeras.** The 3' (red) and 5' (blue) UTRs of BinJV are connected during CPER via a linker (black) that includes an *Orgyia pseudotsugata* multicapsid nucleopolyhedrosis virus immediate-early 2 (OpIE2) promoter and hepatitis delta virus ribozyme-poly A (HDVr-pA) site.

GGATCTACGAACGAGAATAAGTAGAAGAACGGAACGACAGAGTCAGGCCTCAAATGAGCCAGCA  
 TTAATGAGAGTAAGTGCTGCTGCCTGTGCCTCTCCTTAACACGTGGTAGCGCCACTCGTGTTCGTT  
 ACCTAATAGCGCTAGAGTCAGACCCAAGTAGGCCAGGGCTATGGTTGTAAGCCCTGCTGTCTGTG  
 GCAGCCATCCAGTGGTAATGCGTCGCACCACTAAGGATTAATAGACGTATATTGGGAGGGACTGG  
 TGAGGAGCAGCAAGCTCGAGCTGCATACCCACTGGTACTATCGGTTAGAGGAAACCCCTCCAA  
 AATGTAGAGCATCATATCGACACCTGGGAAAGACCGGAGATACCTCTTGCTTCACAGCACTCAAT  
 CCACAAGGCACAGATCGCCGAATAATTGTGGATTGGGGATTGAGAAACATCAAGTATCTGGGTCCG  
 GCATGGCATCTCCACCTCCTCGCGGTCCGACCTGGGCATCCGAAGGAGGACGTTCGTCCTCGGAT  
 GGCTAAGGGAGAGCCACTTTTCTCTCGATTCTCTATCGGAATCTAGGGAGCTCGGATCCAGACATG  
 ATAAGATACATTGATGAGTTTGGACAAACCACAACCTAGAATGCAGTGAAAAAATGCTTTATTTG  
 TGAAATTTGTGATGCTATTGCTTTATTTGTAACCATTATAAGCTGCAATAAACAAGTTAACAACAA  
 CAATTGCTCGAGGGGGGGCCCGGTACCTTGAAGCTGTCCCTGATGGTCGTCATCTACCTGCCTGGA  
 CAGCATGGCCTGCAACGCGGGCATCCCGATGCCGCCGGAAGCGAGAAGAATCATAATGGGGAAAG  
 GCCATCCAGCCTCGCGTCGGCGCTTAAGGATCATGATGATAAACAATGTATGGTGCTAATGTTGCT  
 TCAACAACAATTCTGTTGAACTGTGTTTTCATGTTTGCCAACAAGCACCTTTATACTCGGTGGCCTC  
 CCCACCACCAACTTTTTTGCACCTGCAAAAAAACACGCTTTTGCACGCGGGCCCATACATAGTACAA  
 ACTCTACGTTTCGTAGACTATTTTACATAAATAGTCTACACCGTTGTATACGCTCCAAATACACTAC  
 CACACATTGAACCTTTTTGCAGTGCAAAAAAGTACGTGTCCGCAGTCACGTAGGCCCGGCCTTATCG  
 GGTCGCGTCCTGTACGTACGAATCACATTATCGGACCGGACGAGTGTTGTCTTATCGTGACAGGA  
 CGCCAGCTTCCGTGTGTTGCTAACCGCAGCCGGACGCAACTCCTTATCGGAACAGGACGCGCCTCCA  
 TATCAGCCGCGCGTTATCTCATGCGCGTGACCGGACACGAGGCGCCCGTCCCGCTTATCGCGCCTA  
 TAAATACAGCCCACAACGATCTGGTAAACAGTATAATTTGCGTGTGCGTTTTCAAAACACAGATTGT  
 ATTGAAAGTACGTAAGAGTATAACACGTTGGAATAAAGTTTTGGATCAAGAGGAAAATC
